# Supplementary material
Source: Springer Nature journal article supplement (https://www.springermedizin.de/resource/supplementary/12875_2010_496_MOESM3_ESM.pdf/9434738)
Supplement: MOESM3 [file 9434738]

**Table 1: Comparison of national and WestREN profiles**

|                                     | <b>O Dowd 1992[5]</b> | <b>O Dowd 2005[5]</b> | <b>WestREN 2009</b> |
|-------------------------------------|-----------------------|-----------------------|---------------------|
| No of practices                     | 428                   | 545                   | 71                  |
| Response Rate                       | 68%                   | 87%                   | 73%                 |
| <b><u>Practice type</u></b>         |                       |                       |                     |
| GMS + Private                       | 91%                   | 96%                   | 100%                |
| Private Practice only               | 9%                    | 4%                    | 0%                  |
| <b><u>GMS List size</u></b>         |                       |                       |                     |
| <500                                | 25%*                  | 27%*                  | 4%                  |
| 1000-1999                           | 27%*                  | 21%                   | 38%                 |
| >2000                               | 3%*                   | <2%                   | 14%                 |
| <b><u>Practice Location</u></b>     |                       |                       |                     |
| Rural Location                      | 33%                   | 21%                   | 50%                 |
| Urban location                      | 47%                   | 43%                   | 25%                 |
| Mixed Location                      | 20%                   | 36%                   | 25%                 |
| <b><u>Premises</u></b>              |                       |                       |                     |
| Purpose built premises              | 27%                   | 43%                   | 54%                 |
| Adapted premises                    | 46%                   | 46%                   | 40%                 |
| Attached to residence               | 27%                   | 11%                   | 5.7%                |
| <b><u>Practice Organisation</u></b> |                       |                       |                     |
| Computerisation                     | 27%                   | 89%                   | 100%                |
| Appointment system                  | 58%                   | 81%                   | 96%                 |
| <b><u>Out of Hours</u></b>          |                       |                       |                     |
| Internal Rota                       | 25%*                  | 5%*                   | 4%                  |
| External Rota                       | 60%                   | 15%*                  | 19%                 |
| Coop                                | 0%                    | 42%                   | 61%                 |
| <b><u>Practice staff</u></b>        |                       |                       |                     |
| Single handed GP practice           | 57%*                  | 35%                   | 25%                 |
| Practice nurse (FT and PT)          | 17%*                  | 75%                   | 92%                 |
| <b><u>Education</u></b>             |                       |                       |                     |
| Involved in postgraduate training   | 8%                    | 18%                   | 42%                 |

All figures are in percentages apart from 'Number of practices'

\*These figures were obtained by extrapolation from graph in O Dowd et al [5]
